# Supplementary material for: Facile assembly of nanosheet array-like CuMgAl-layered double hydroxide/rGO nanohybrids for highly efficient reduction of 4-nitrophenol
Source: Royal Society of Chemistry journal article supplement (doi:10.1039/c6ta08313g), 2016-01-01
Supplement: c6ta08313g1.pdf [file c6ta08313g1.pdf]

## Electronic Supplementary Material

### **Facile assembly of nanosheet array-like CuMgAl-layered double hydroxide/rGO nanohybrids for highly efficient reduction of 4-nitrophenol**

Liguang Dou and Hui Zhang\*

*State Key Laboratory of Chemical Resource Engineering, Beijing University of Chemical Technology, Beijing 100029, China.*

\*Correspondence should be addressed to Hui Zhang.

E-mail: [Huizhang67@gst21.com](mailto:Huizhang67@gst21.com)

Tel.: +8610 64425872

Fax: +8610 64425385

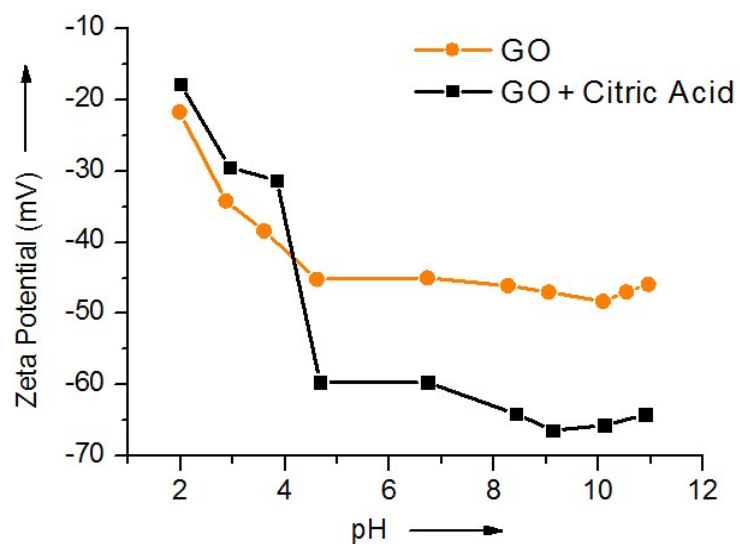

**Figure S1.** Zeta potential profiles of a GO dispersion (~0.05 mg/mL) before and after addition of citric acid (~0.2 mg/mL) as a function of pH values in aqueous dispersion.

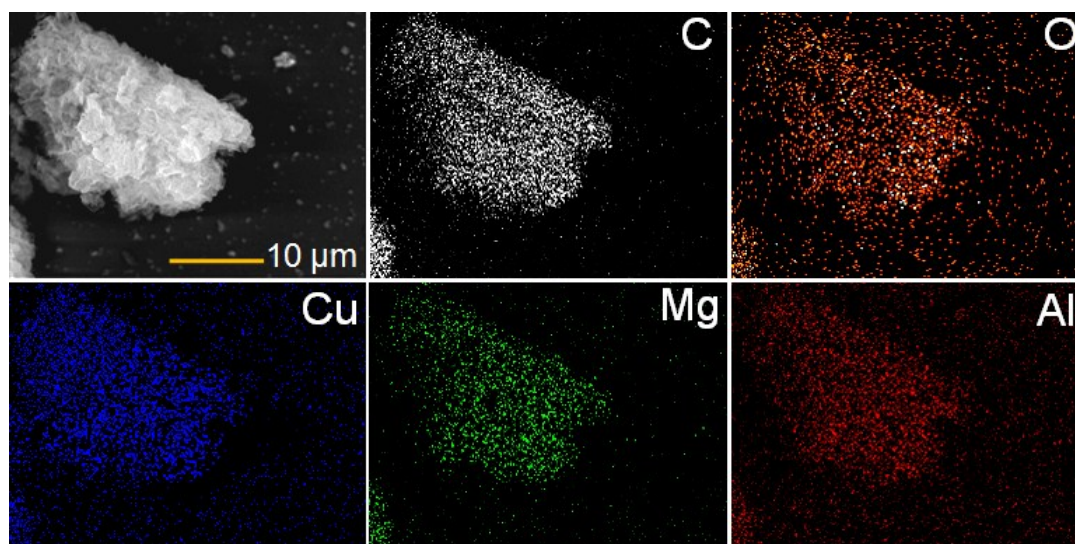

**Figure S2.** EDS mapping analyses of the nanohybrid 1.0Cu-LDH/rGO.

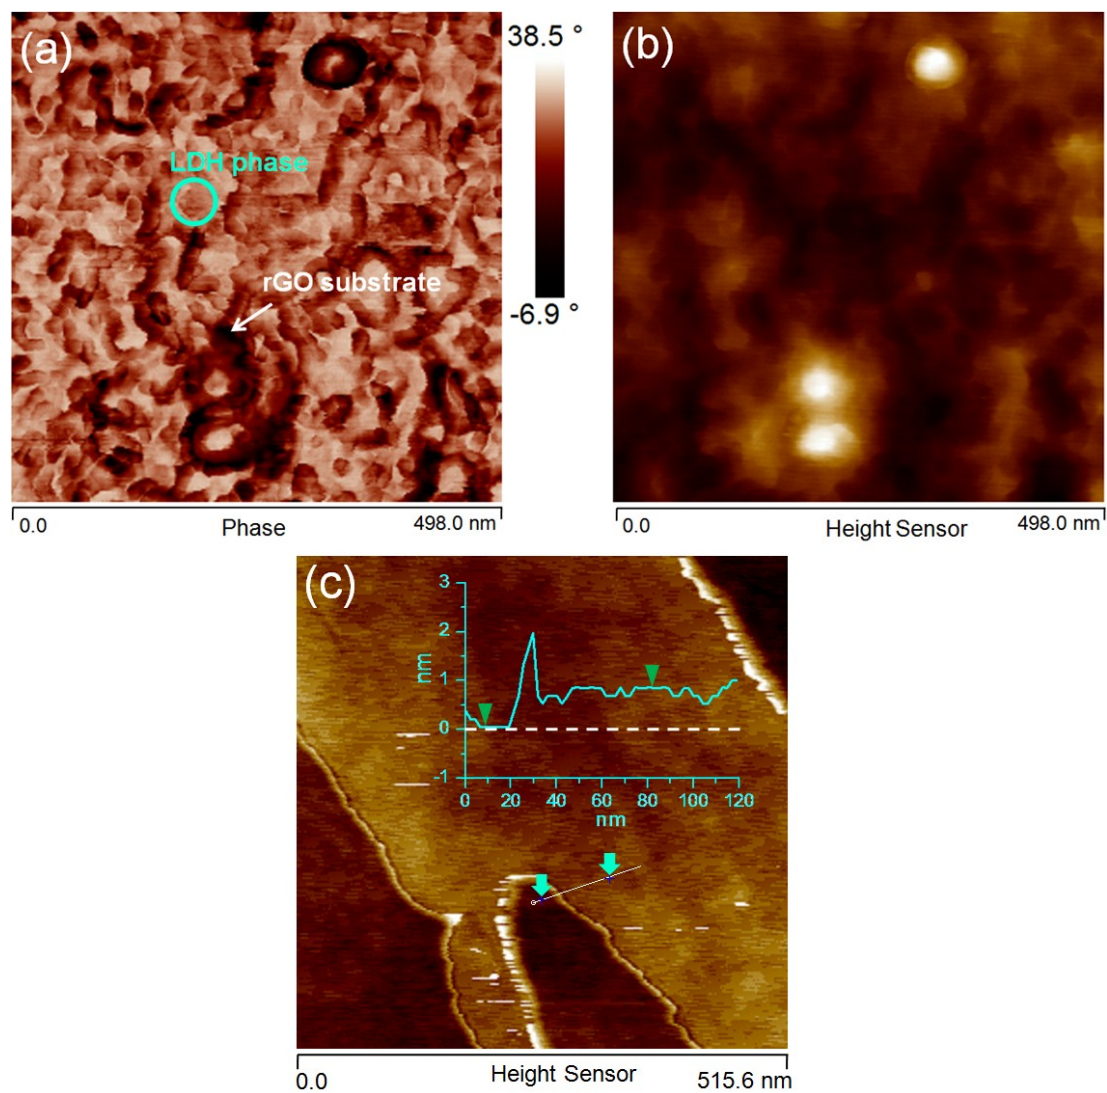

**Figure S3.** Two-dimensional phase (a) and topography (b) AFM images of 1.0Cu-LDH/rGO and the topography image together with cross-section analysis of rGO layer derived from 1.0Cu-LDH/rGO after treatment with 2 M HCl for 2 days (c).



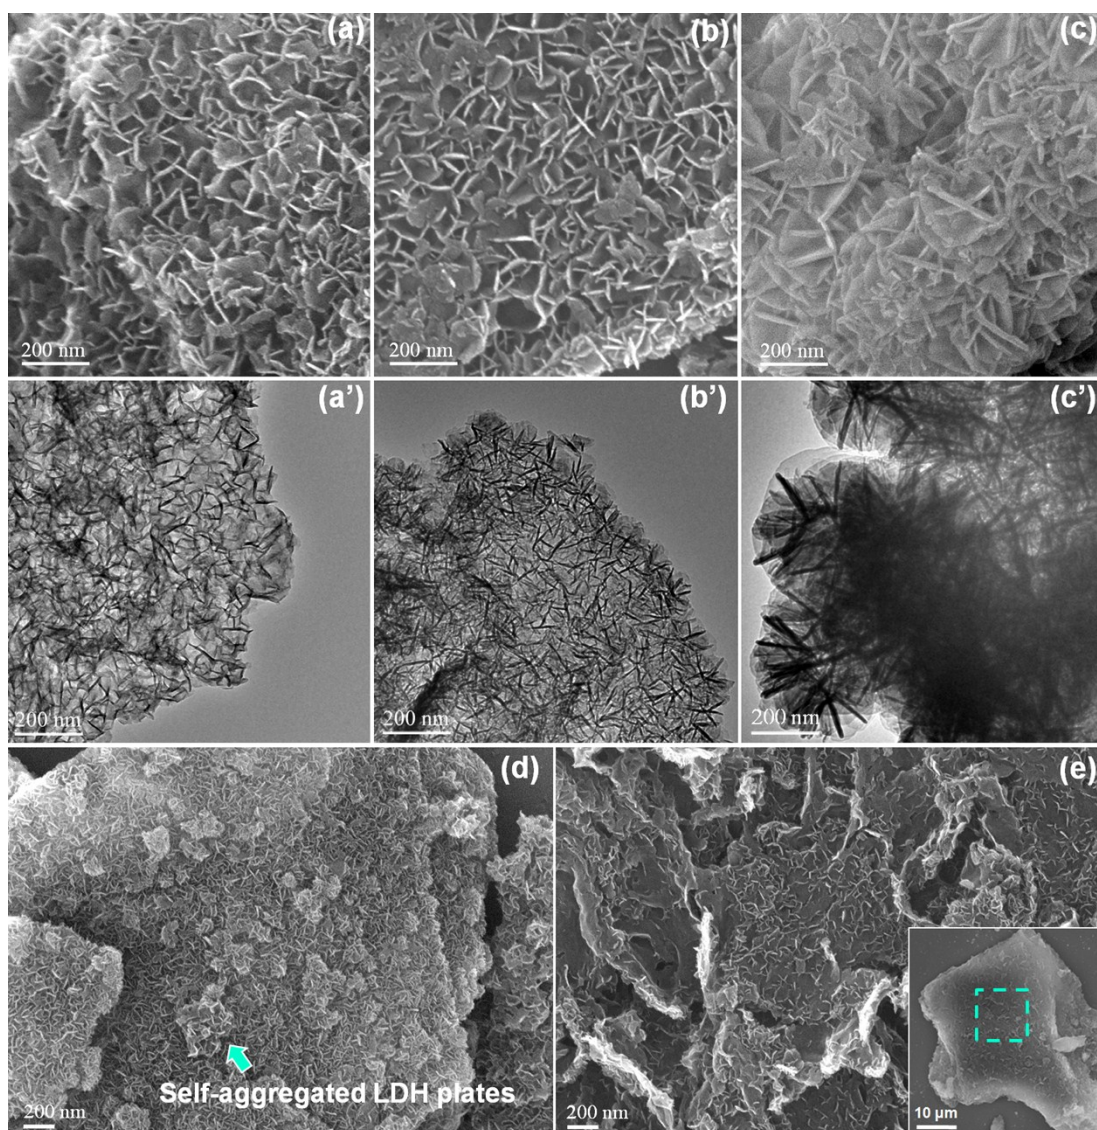

**Figure S4.** SEM (a-e) and TEM (a'-c') images of 0.5Cu-LDH/rGO (a, a'), 1.5Cu-LDH/rGO (b, b'), Cu-LDH (c, c'), 1.0Cu-LDH/rGO-25 (d) and 1.0Cu-LDH/rGO-100 (e).

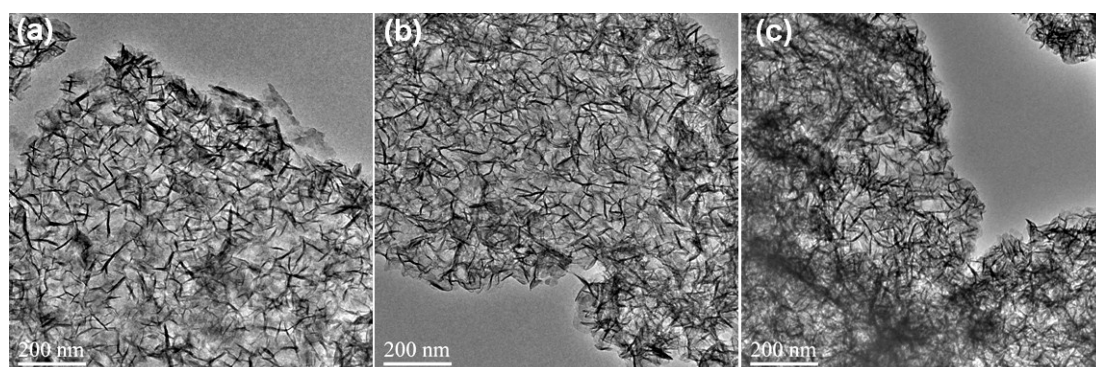

**Figure S5.** TEM images of  $\text{Co}_3\text{Al-LDH/rGO}$  (a),  $\text{Co}_2\text{Ni}_1\text{Al-LDH/rGO}$  (b), and  $\text{Cu}_1\text{Co}_1\text{Mg}_1\text{Al-LDH/rGO}$  (c) nanohybrids prepared by a green aqueous-phase coprecipitation strategy.

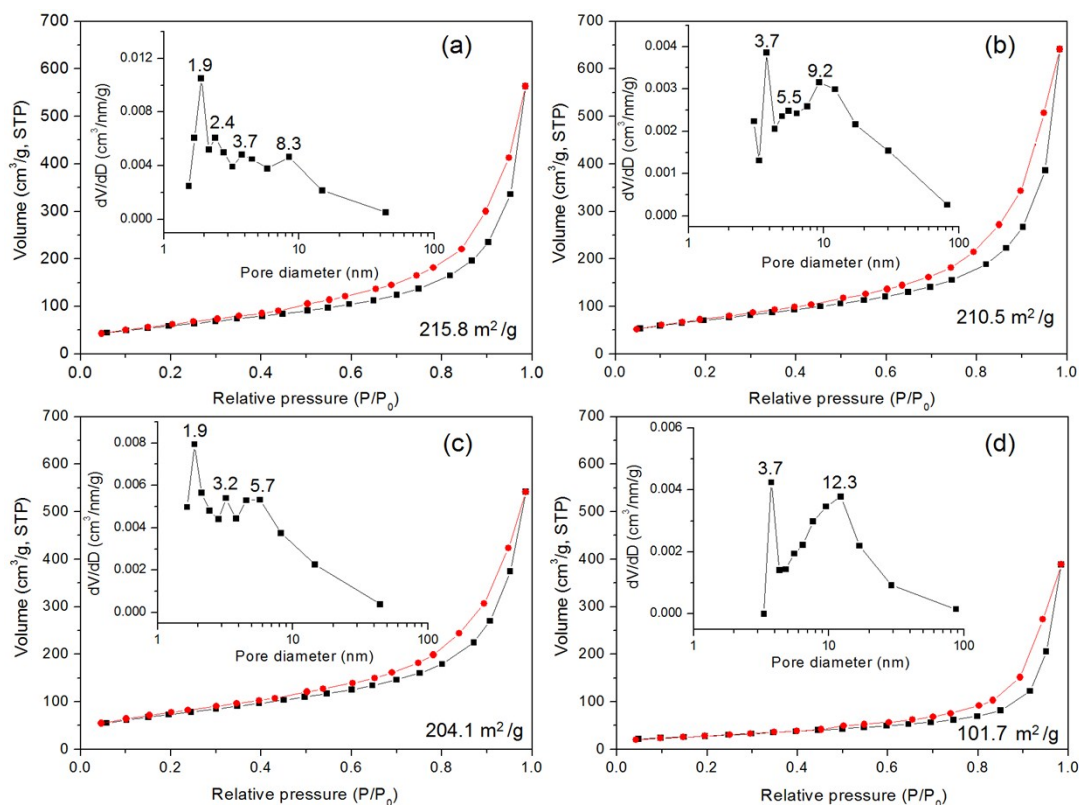

**Figure S6.** N<sub>2</sub> adsorption/desorption isotherms (inset: pore size distribution) of the hybrid catalysts 0.5Cu-LDH/rGO (a), 1.0 Cu-LDH/rGO (b), 1.5Cu-LDH/rGO (c) and Cu-LDH (d).

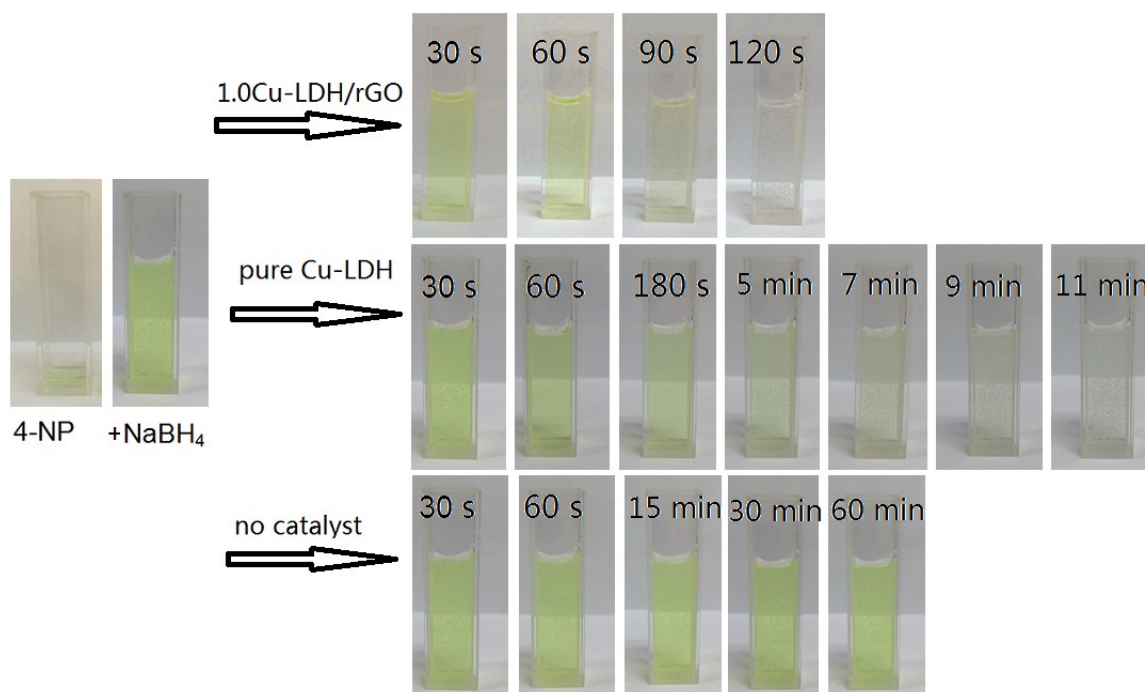

**Figure S7.** The time-dependent color changes of the 4-NP solutions during the reduction of 4-NP by NaBH<sub>4</sub> without catalyst and with 1.0Cu-LDH/rGO compared to pure Cu-LDH.



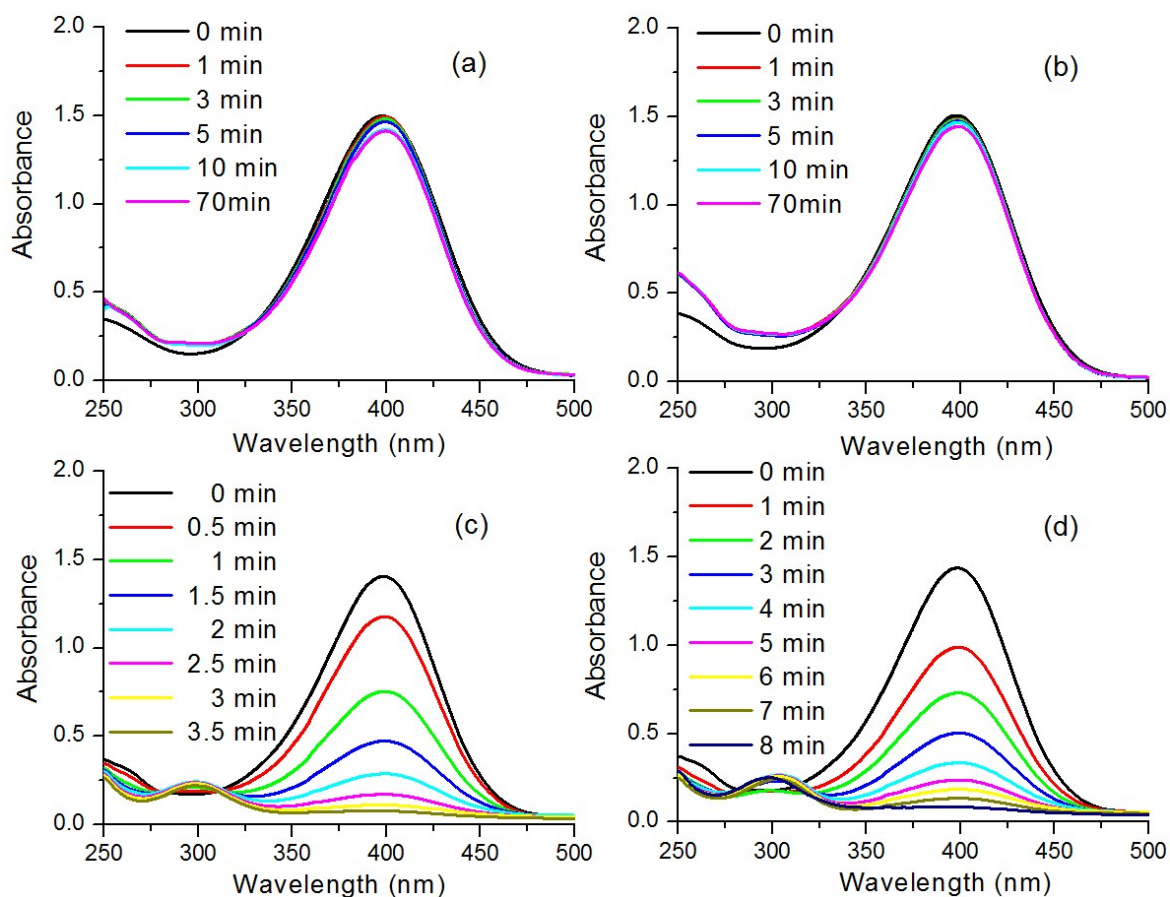

**Figure S8.** Time-dependent UV-vis absorption spectra of 4-NP solutions during the reduction of 4-NP by  $\text{NaBH}_4$  with MgAl-LDH (a), GO (b), 1.0Cu-LDH/rGO-25 (c) and 1.0Cu-LDH/rGO-100 (d).

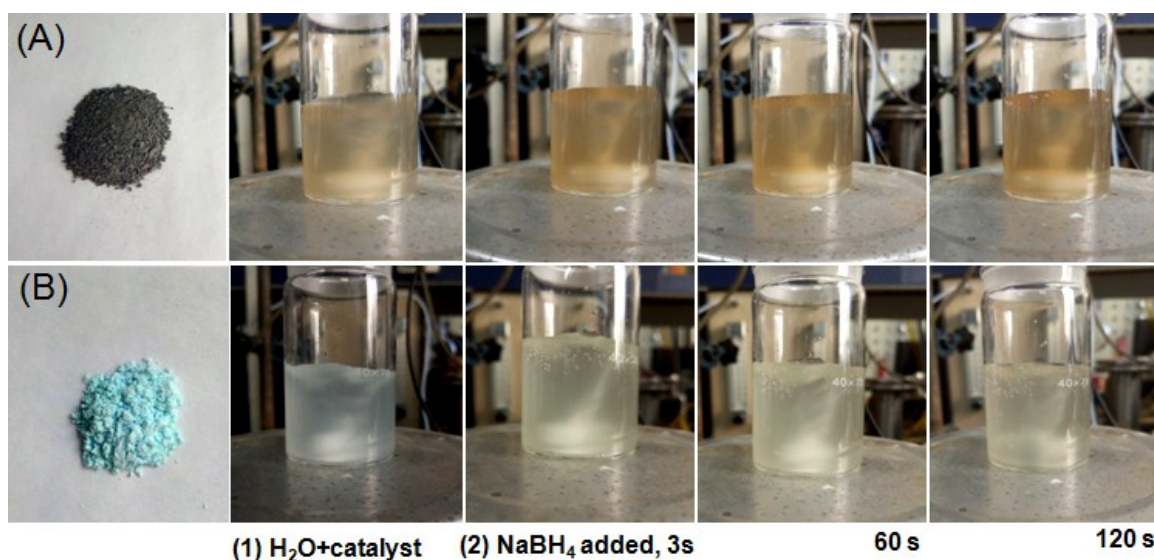

**Figure S9.** Photos of catalysts suspension (30 mL, 0.4 mg/mL) before and after addition of  $\text{NaBH}_4$  (0.45 g) for 1.0Cu-LDH/rGO hybrid (A) and pure Cu-LDH (B).

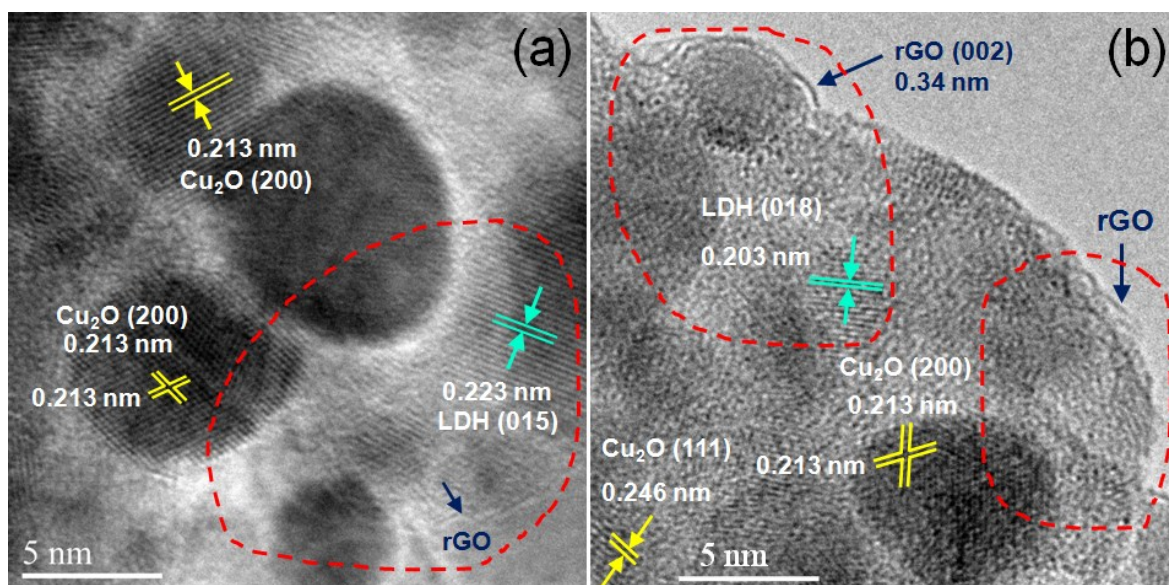

**Figure S10.** Evidence of strong three-phase synergistic effect among the *in situ* generated  $\text{Cu}_2\text{O}$ ,  $x\text{Cu-LDH}$  and  $\text{rGO}$  substrate during the reduction reaction: HRTEM images (a and b) of  $1.0\text{Cu-LDH/rGO}$  hybrid after treatment by  $\text{NaBH}_4$  for 120 s.

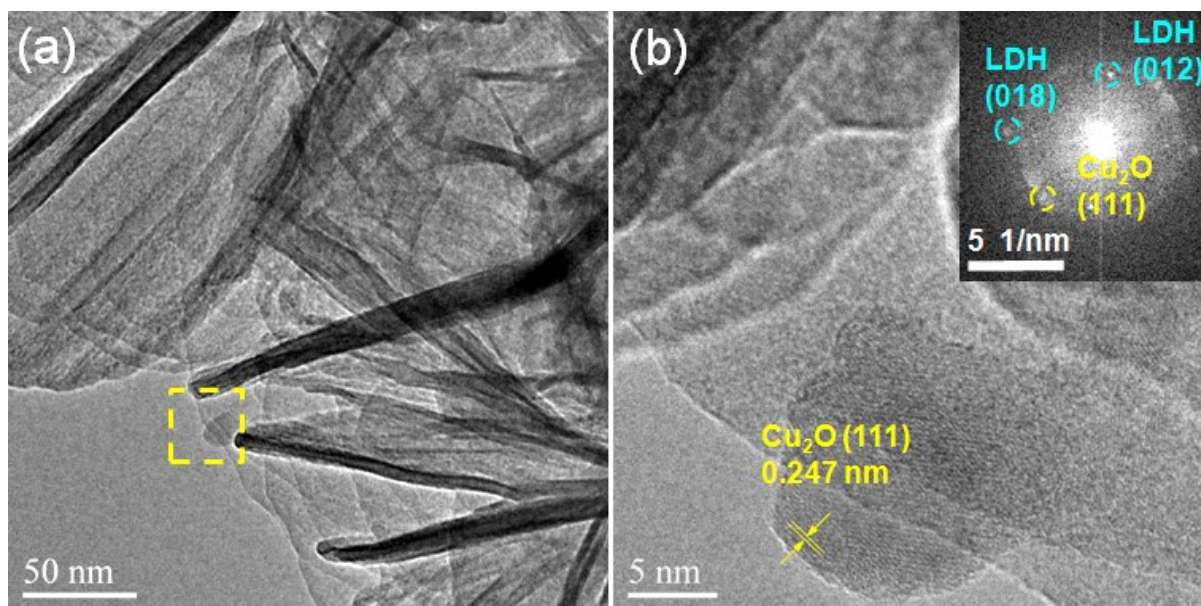

**Figure S11.** TEM (a) and HRTEM (b) images of pure  $\text{Cu-LDH}$  after treatment by  $\text{NaBH}_4$  for 120 s (inset in (b), the SAED pattern).



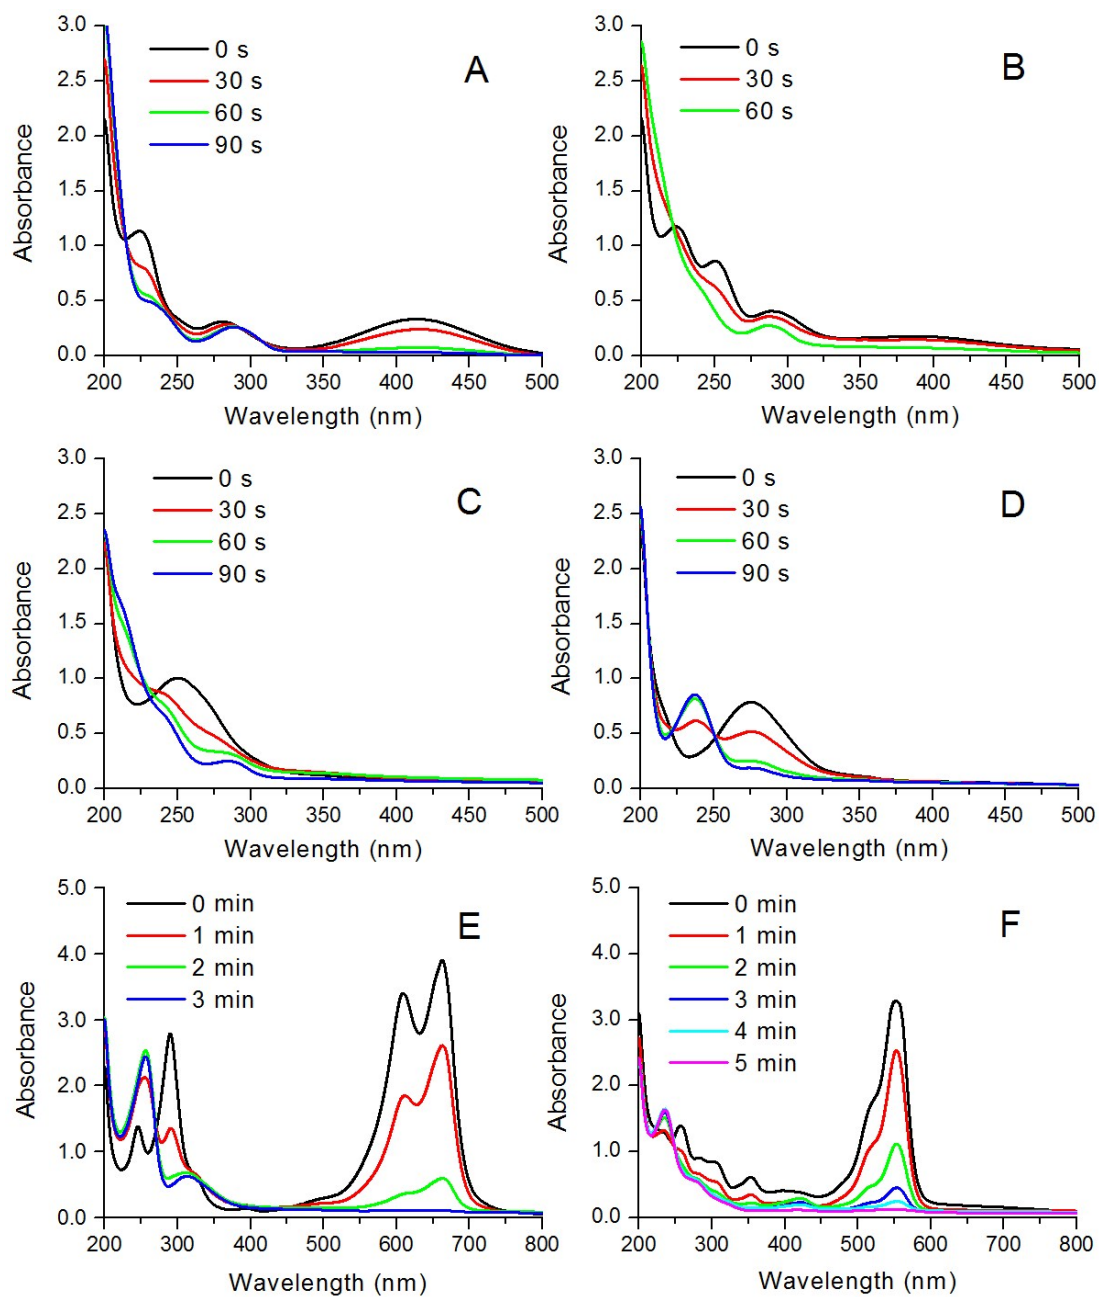

**Figure S12.** UV-vis absorption spectra of the reduction and degradation of diverse nitroarenes (A: 2-NP, B: 3-NP, C: 2,4-dinitrotoluene, and D: 4-nitrobenzaldehyde) and organic dyes (E: MB, and F: RhB) by  $\text{NaBH}_4$  with the hybrid  $1.0\text{Cu-LDH/rGO}$ .



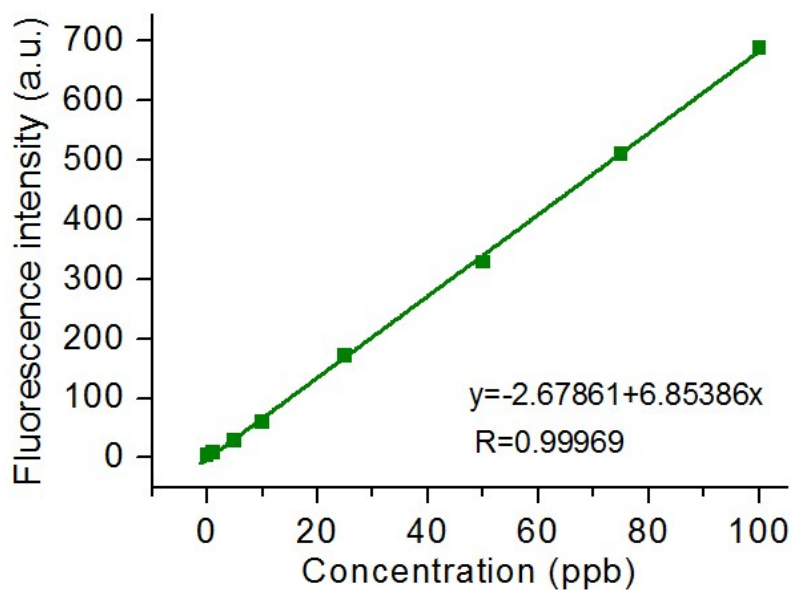

**Figure S13.** The correlated calibration curve of pyrene solution measured at 374 nm.

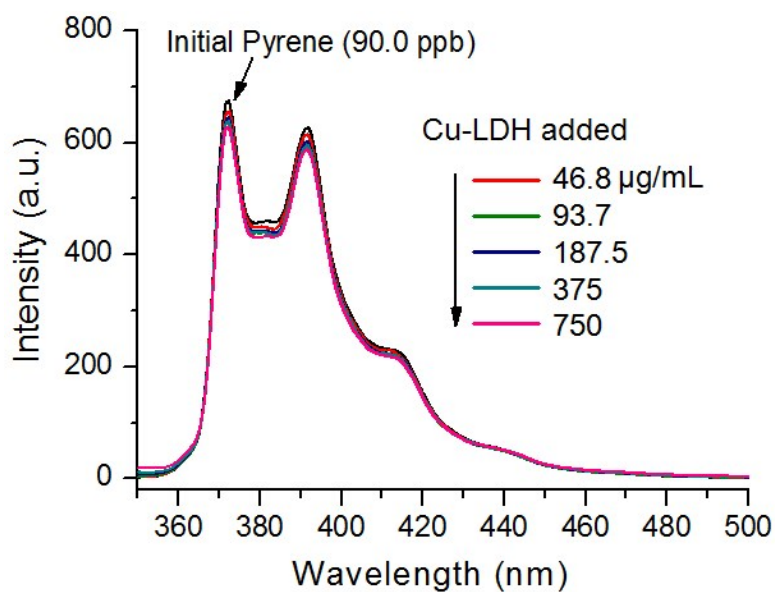

**Figure S14.** Fluorescence quenching of pyrene-contaminated water by adding Cu-LDH with varied concentrations ( $\lambda_{\text{ex}}=335$  nm; initial concentration of pyrene: 90.0 ppb; adsorption time: 0.5 min).

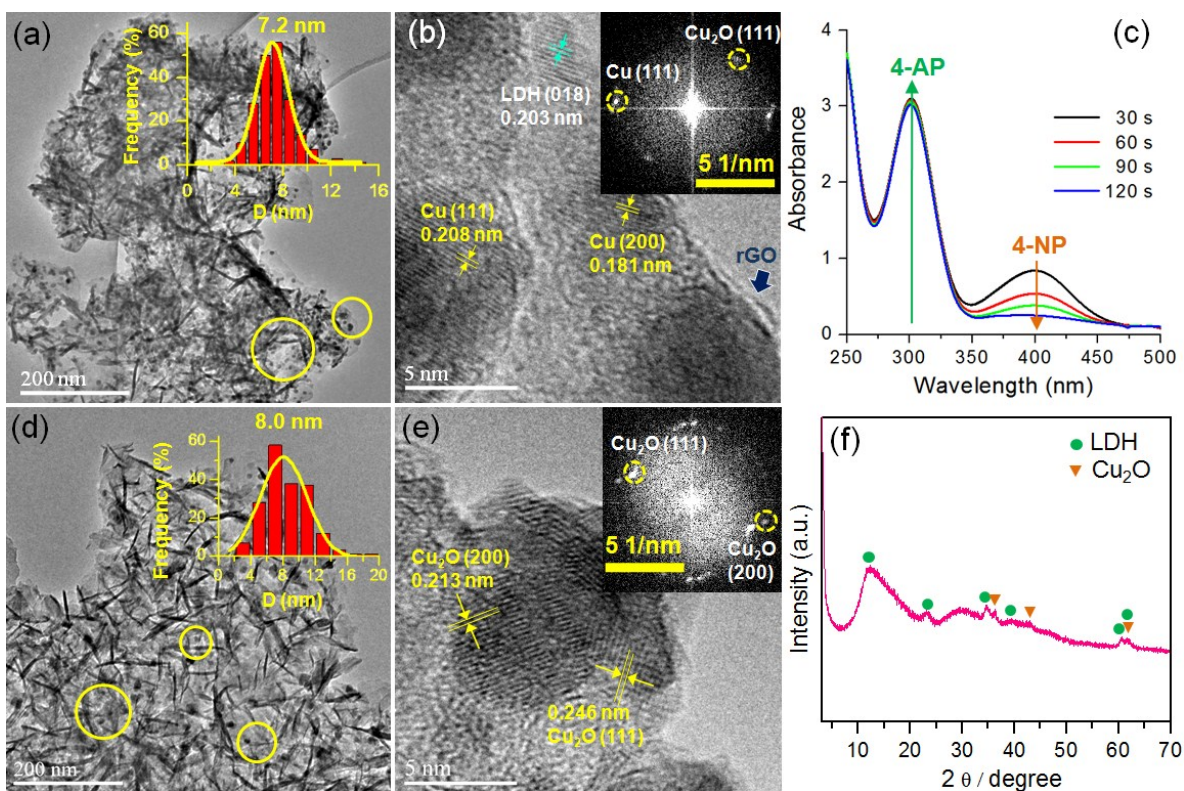

**Figure S15.** TEM (a, d), HRTEM (b, e), successive UV-vis absorption spectra (c) and XRD (f) of 1.0Cu-LDH/rGO recovered from 20th (a-c) and 10th (d-f) cycles of catalytic reduction of 4-NP (insets in (a, d), the particle size distributions on more than 200 particles; insets in (b, e), the SAED patterns).

**Table S1.** XRD parameters of the hybrids  $x$ Cu-LDH/rGO, Cu-LDH and MgAl-LDH.

| Samples       | $d_{003}/\text{nm}$ | $d_{110}/\text{nm}$ | $c/\text{nm}^a$ | $a/\text{nm}^a$ | $D_{003}/\text{nm}^b$ | $D_{110}/\text{nm}^b$ | $I_{110}/I_{003}^c$ |
|---------------|---------------------|---------------------|-----------------|-----------------|-----------------------|-----------------------|---------------------|
| 0.5Cu-LDH/rGO | 0.7583              | 0.1525              | 2.27            | 0.3050          | 3.82                  | 15.7                  | 0.29                |
| 1.0Cu-LDH/rGO | 0.7542              | 0.1526              | 2.26            | 0.3052          | 3.31                  | 15.9                  | 0.35                |
| 1.5Cu-LDH/rGO | 0.7556              | 0.1529              | 2.27            | 0.3059          | 3.52                  | 16.5                  | 0.22                |
| Cu-LDH        | 0.7690              | 0.1533              | 2.31            | 0.3067          | 8.30                  | 22.0                  | 0.16                |
| MgAl-LDH      | 0.7815              | 0.1528              | 2.34            | 0.3057          | 7.52                  | 21.2                  | 0.18                |

<sup>a</sup>Based on hexagonal crystal system,  $a = 2d_{110}$ ,  $c = 3d_{003}$ .

<sup>b</sup>Based on Scherrer equation.  $D_{(hkl)} = k\lambda/(\beta\cos\theta)$  ( $k = 0.89$ ,  $\lambda$  is the X-ray wavelength (0.1542 nm),  $\theta$  is the diffraction angle and  $\beta$  is the full width at half-maximum (in radian)).

<sup>c</sup>The diffraction intensity ratio of (110) line to (003) line.

**Table S2.** The chemical compositions of the hybrids  $x$ Cu-LDH/rGO and Cu-LDH.

| Catalysts     | ICP                  |          | XPS                                           |                            |
|---------------|----------------------|----------|-----------------------------------------------|----------------------------|
|               | Cu/Mg/Al molar ratio | Cu (wt%) | Cu/Mg/Al molar ratio                          | Cu (wt%)                   |
| 0.5Cu-LDH/rGO | 0.50:2.47:1.00       | 8.36     | 0.50:4.98:3.65                                | 5.69                       |
| 1.0Cu-LDH/rGO | 1.00:2.02:1.03       | 16.50    | 1.00:3.88:5.72<br>1.00:1.55:5.49 <sup>a</sup> | 9.41<br>12.61 <sup>a</sup> |
| 1.5Cu-LDH/rGO | 1.50:1.45:1.02       | 22.38    | 1.50:3.58:7.61                                | 13.13                      |
| Cu-LDH        | 1.00:1.98:0.96       | 17.27    | 1.00:4.48:4.73                                | 11.28                      |

<sup>a</sup> 1.0Cu-LDH/rGO treated by NaBH<sub>4</sub> for 120 s.



**Table S3.** Catalyzing reduction and degradation of diverse nitroarenes and organic dyes over the hierarchical nanoarray-like hybrid 1.0Cu-LDH/rGO.

| Entry | Substrate                                                                           | Product                                                                            | Time (min) | TOF (h <sup>-1</sup> ) |
|-------|-------------------------------------------------------------------------------------|------------------------------------------------------------------------------------|------------|------------------------|
| 1     | 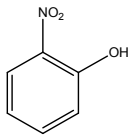   |   | 1.5        | 215.9                  |
| 2     |    |   | 1.0        | 323.9                  |
| 3     |    |   | 1.5        | 215.9                  |
| 4     |   |  | 1.5        | 215.9                  |
| 5     |  | Aromatic ring-containing complex                                                   | 3.0        | 108.0                  |
| 6     |  | Aromatic ring-containing complex                                                   | 5.0        | 64.8                   |
